# Supplementary material for: Eco-Friendly Synthesis of PEtOz-PA: A Promising Polymer for the Formulation of Curcumin-Loaded Micelles
Source: MDPI journal article supplement (doi:10.3390/molecules27123788), 2022-06-12

# Eco-Friendly Synthesis of PEtOz-PA: A Promising Polymer for the Formulation of Curcumin-Loaded Micelles

Monica Nardi <sup>1,2,\*</sup>, Emiliana Sarubbi <sup>1</sup> and Satyanarayana Somavarapu <sup>1</sup>

<sup>1</sup> Department of Pharmaceutics, UCL School of Pharmacy, London WC1N 1AX, UK;  
sarubbiemiliana@gmail.com (E.S.); s.somavarapu@ucl.ac.uk (S.S.)

<sup>2</sup> Dipartimento di Scienze della Salute, Università Magna Græcia, Viale Europa, 88100 Germaneto, Italy

\* Correspondence: monica.nardi@unicz.it; Tel.: +39-09613694116

**Electronic Supplementary Material**

## Table of Contents

|                                                                                                                                                                                     |
|-------------------------------------------------------------------------------------------------------------------------------------------------------------------------------------|
| <i>Experimental Section</i>                                                                                                                                                         |
| <i>General Information</i>                                                                                                                                                          |
| <i>Material</i>                                                                                                                                                                     |
| <i>Synthesis of Poly(2-ethyl-2-oxazoline) palmitoyl ester (PEtOz-PA)</i>                                                                                                            |
| <i>Figure S1: <math>^{13}\text{C}</math>-NMR of PetOz-PA</i>                                                                                                                        |
| <i>Preparation of PEtOz-PA and PEtOz-PA(C) polymeric micelles.</i>                                                                                                                  |
| <i>Encapsulation efficiency (EE)</i>                                                                                                                                                |
| <i>Figure S2: Calibration Curve for determination EE</i><br><br>Calibration curve PetOz-PA(C) (1:20)<br>Calibration curve PetOz-PA(C) (1:10)<br>Calibration curve PetOz-PA(C) (1:5) |
| <i>In vitro release of curcumin</i>                                                                                                                                                 |
| <i>Figure S3: DPPH assay</i>                                                                                                                                                        |

## Experimental Section

### *General information*

#### *Materials*

Palmitoyl Chloride was purchased from Tokyo Chemical Industry (UK). Poly(2-ethyl-2-oxazoline) (PetOz) average  $M_n$  10,000 and  $PDI \leq 1.5$ , 2-Methyltetrahydrofuran (Me-THF), Curcumin (C,  $\geq 94\%$  curcuminoid content), pyrene ( $\geq 99\%$ ) and Erbium(III) trifluoromethanesulfonate were obtained from Sigma-Aldrich (UK). Deuteriochloroform (99.8 atom % D) was purchased from Cambridge Isotope Lab. Inc. (USA). Acetonitrile, water (HPLC grade) and methanol were purchased from Fisher Scientific (United Kingdom). Deionized water was prepared in-house (PURELAB, ELGA, UK).

#### *Synthesis of Poly(2-ethyl-2-oxazoline) palmitoyl ester (PEtOz-PA)*

To a solution of Poly(2-ethyl-2-oxazoline) (10000  $M_n$ ; 0.1 mmol) were added a solution of palmitoyl chloride (0.15 mmol) in 2-MeTHF (8 mL) and 10 mol % of  $Er(OTf)_3$  under stirring. The mixture was reacted for 4 h at reflux and was evaporated under vacuum. The mixture was poured in water saturated with  $NaHCO_3$  and extracted with 2-MeTHF ( $3 \times 10$  mL). The organic layers were combined and dried on  $Na_2SO_4$  and filtered, and the solvent was evaporated under vacuum. The purity of product obtained, was proved by Resonance Magnetic Spectrum.

Poly(2-ethyl-2-oxazoline) palmitoyl ester: Grey solid obtained in 90% yield;  $^1H$ -NMR (500 MHz,  $CDCl_3$ ):  $\delta$  = 3.50–3.40 (m, 484 H,  $CH_2$  alk), 2.45–2.40 (m, 134H,  $CH_2$  alk), 2.20–2.30 (m, 102H,  $CH_2$  alk, 2H,  $CH_2$  palmitoyl), 1.60–1.80 (m, 42H,  $CH_2$  alk), 1.25–1.35 (m, 10H, 10H,  $CH_2$  palmitoyl), 1.20–1.25 (m, 16H,  $CH_2$  palmitoyl), 1.10–1.20 (m, 343H,  $CH_2$ alk), 0.85–0.95 (m, 3H,  $CH_3$  palmitoyl).  $^{13}C$ -NMR (100 MHz,  $CDCl_3$ ): 9.40, 15.29, 26.00, 29.00, 34.06, 43.21, 45.32, 66.10, 173.9, 174.2, 179.5. FT-IR (1743  $cm^{-1}$  C=O stretching vibration).

Figure S1:  $^{13}\text{C}$ -NMR PEToz-PA

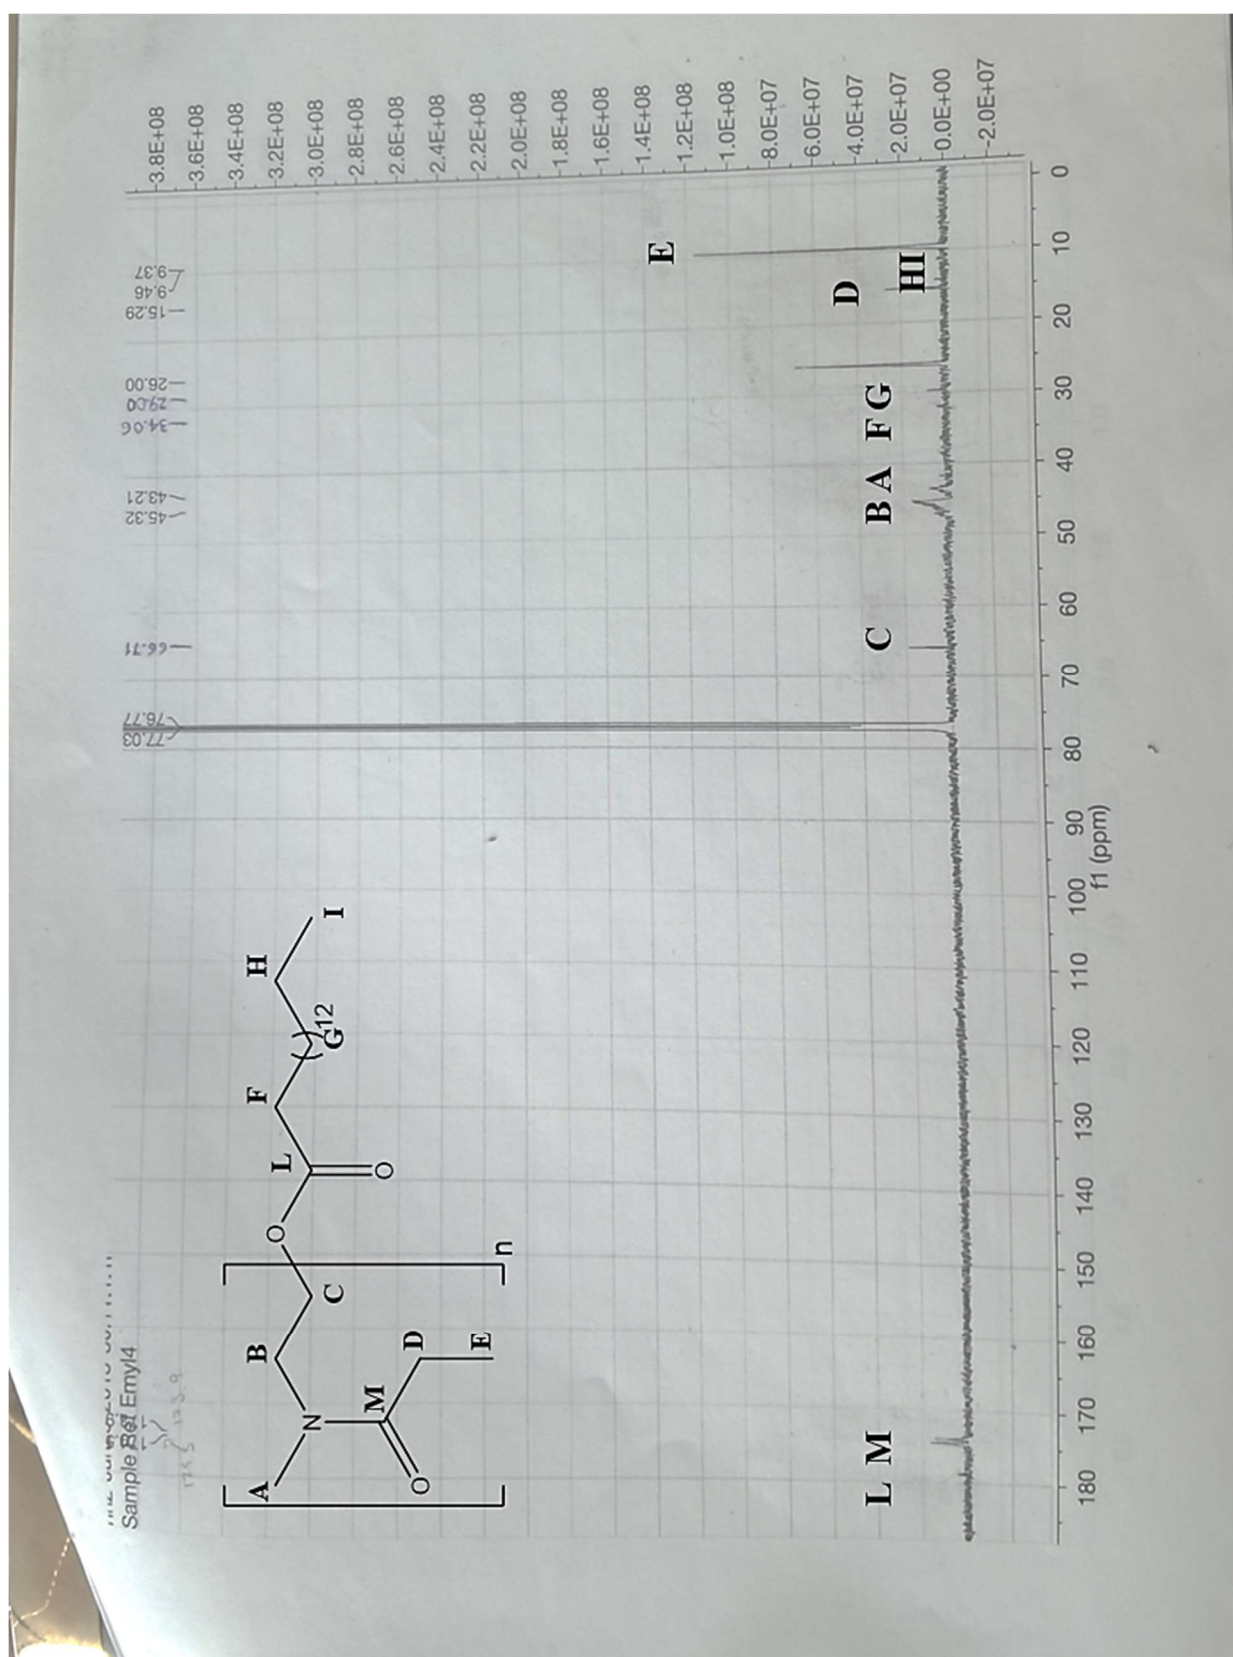

Preparation of PEToz-PA and PEToz-PA(C) polymeric micelles.

PetOz-PA(C) NPs were prepared using the double emulsion solvent evaporation technique as previously described [44]. The drug (C, 2 mg), PEtOz-PA (10, 20 and 40 mg) were dissolved in CH<sub>2</sub>Cl<sub>2</sub> (6 ml) and the mixture sonicated using a VWR ultrasonic cleaner bath USC300T (VWR International Limited, UK) until complete dissolution. The solvent was then evaporated at 200 rpm and 80 °C under vacuum until a thin film was obtained using a rotary evaporator (Hei-VAP Advantage Rotary Evaporator, Heidolph, Germany). The resultant thin film was hydrated with 10 mL of warmed distilled water and sonicated for a further 15 min until the film was fully removed and dispersed in the water. The solution was filtered through a sterile 0.22 µm filter (30mm HPLC Syringe Filter Glass Fibre Prefilter/PTFE) and was stored at 4–8° C before being characterised. A proportion of the samples were lyophilized using a Virtis AdVantage 2.0 BenchTop freezedryer (SP Industries, UK) for further analysis.

### Encapsulation efficiency (EE)

The formulations (1 ml) were diluted to 5 ml with methanol and, to evaluate curcumin content, were analyzed by reverse-phase HPLC on a Jasco LC-NetII/ADC, UV-2075 detector. A Luna Altech 4.6 × 150 mm Adsorbosphere C18 column with 5 µm particles of bonded silica gel with a guard column (4.6 × 7.4 mm Adsorbosphere C18) was used. Absorbance chromatograms were obtained at 255 nm and all the measurements were performed at room temperature.

A binary mixture of acetonitrile/water (70/30, v/v) was applied as mobile phase with a flow rate of 1 mL/min and 20 µl injection loop. The method was validated for linearity, precision and recovery using standard solution (200µg/ml; 140µg/ml; 100µg/ml; 70µg/ml; 50µg/ml; 35 µg/ml; 25 µg/ml). The calibration curve showed good linear regression ( $R^2 = 0.981$ ) over the wide test ranges. The calibration curve was linear in the used solvent. The experiments were repeated for three times

Figure S2: Calibration Curve for determination EE

Calibration curve PetOz-PA(C) (1:20)

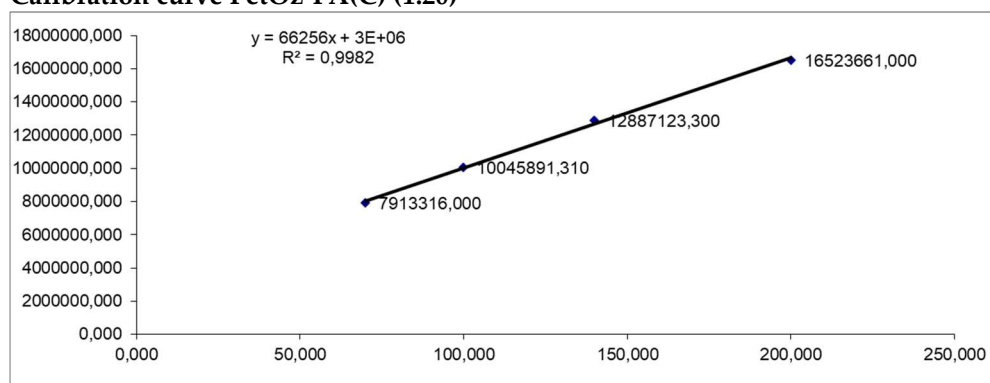

| ug/ml    | Area (nRIU*s) |                          |
|----------|---------------|--------------------------|
| 200,000  | 16523661,000  |                          |
| 140,000  | 12887123,300  |                          |
| 100,000  | 10045891,310  |                          |
| 70,000   | 7913316,000   |                          |
| 50,000   | 7701354,167   |                          |
| 35,000   | 5899447,000   |                          |
| 25,000   | 5060116,333   |                          |
| Sample 1 | 5840020       | 83,61537068 ug/ml        |
| Sample 2 | 5869100       | 84,05427433 ug/ml        |
| Sample 3 | 5811011       | 83,17753864 ug/ml        |
|          |               | 83,61573± 0,438368 ug/ml |

Calibration curve PetOz-PA(C) (1:10)

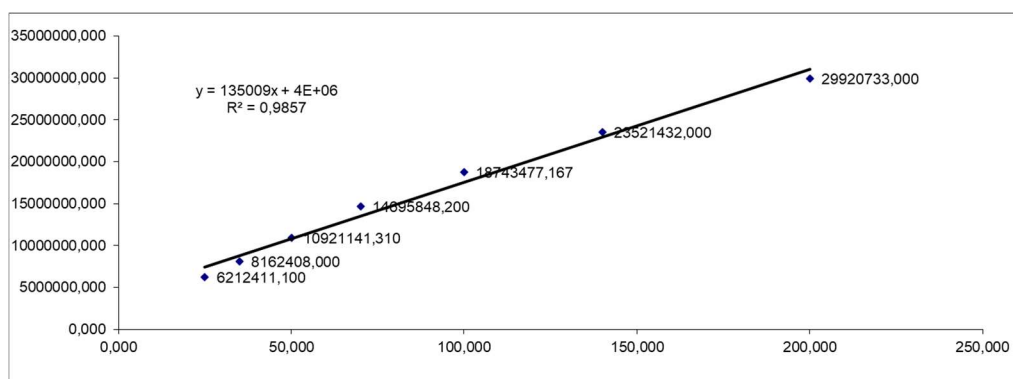

| ug/ml    | Area (nRIU*s) |                                 |
|----------|---------------|---------------------------------|
| 200,000  | 29920733,000  |                                 |
| 140,000  | 23521432,000  |                                 |
| 100,000  | 18743477,167  |                                 |
| 70,000   | 14695848,200  |                                 |
| 50,000   | 10921141,310  |                                 |
| 35,000   | 8162408,000   |                                 |
| 25,000   | 6212411,100   |                                 |
| Sample 1 | 13466001,67   | 96,77874561 ug/ml               |
| Sample 2 | 13424321,89   | 96,47002709 ug/ml               |
| Sample 3 | 13442898,98   | 96,60762601 ug/ml               |
|          |               | 96,61879957 ± 0,154662267 ug/ml |

**Calibration curve PetOz-PA(C) (1:5)**

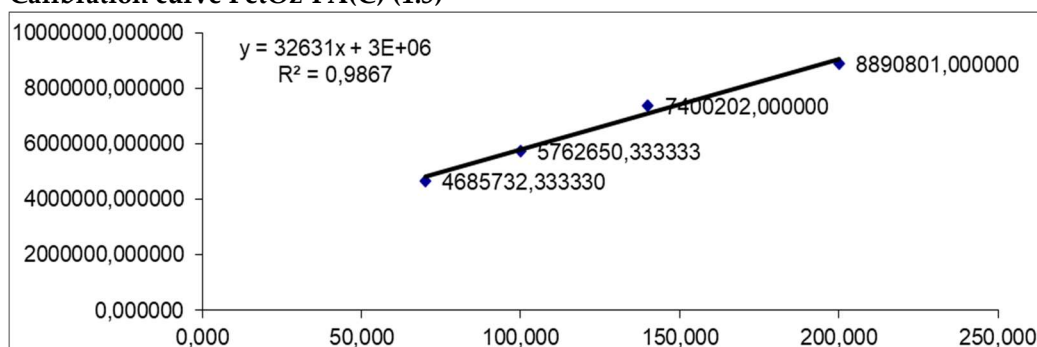

| ug/ml    | Area (nRIU*s)  |                                 |
|----------|----------------|---------------------------------|
| 200,000  | 8890801,000000 |                                 |
| 140,000  | 7400202,000000 |                                 |
| 100,000  | 5762650,333333 |                                 |
| 70,000   | 4685732,333330 |                                 |
| 50,000   | 3349943,333    |                                 |
| 35,000   | 2501573,333    |                                 |
| 25,000   | 2002839,300000 |                                 |
| Sample 1 |                | 68,61389476 ug/ml               |
| Sample 2 |                | 68,61757225 ug/ml               |
| Sample 3 |                | 68,25282707 ug/ml               |
|          |                | 68,49476469 ± 0,209532198 ug/ml |

*In vitro release of curcumin*

The curcumin release was quantified in vitro by a membrane dialysis (MD) method [45], a widely used and versatile method for testing in vitro drug release of particulate formulations. The end-sealed dialysis bag (MW 4 kDa) containing the nanoparticles was placed in 30% ethanol in PBS (Phosphate buffered saline, 0.1 M, pH 7.4, 50 ml) with continuous magnetic stirring at 100 rpm. The buffer solution was used as dissolution medium at 37 ° C, and medium was collected at determined time point. The amount of drug released in the buffer solution was monitored by UV-vis spectroscopy, and the experiments were repeated for three times

**DPPH assay**

The DPPH radical-scavenging activity of the samples was assessed by the Gülçin method [47]. A 1,1-diphenyl-2-picrylhydrazyl radical solution was prepared by dissolving 0.0039 g of DPPH in MeOH to generate a 0.1 mM DPPH stock solution. Working solutions were prepared fresh daily by diluting the stock solution with solvent sufficiently to reduce the absorbance at 517 nm to 1.00 (±0.02). The DPPH radical solution (1 mL) was added to a solution (1 mL) of the compound to be tested in MeOH at different concentrations

**Figure S3: DPPH Assay**

**PetOz-PA(C) (1:20)**

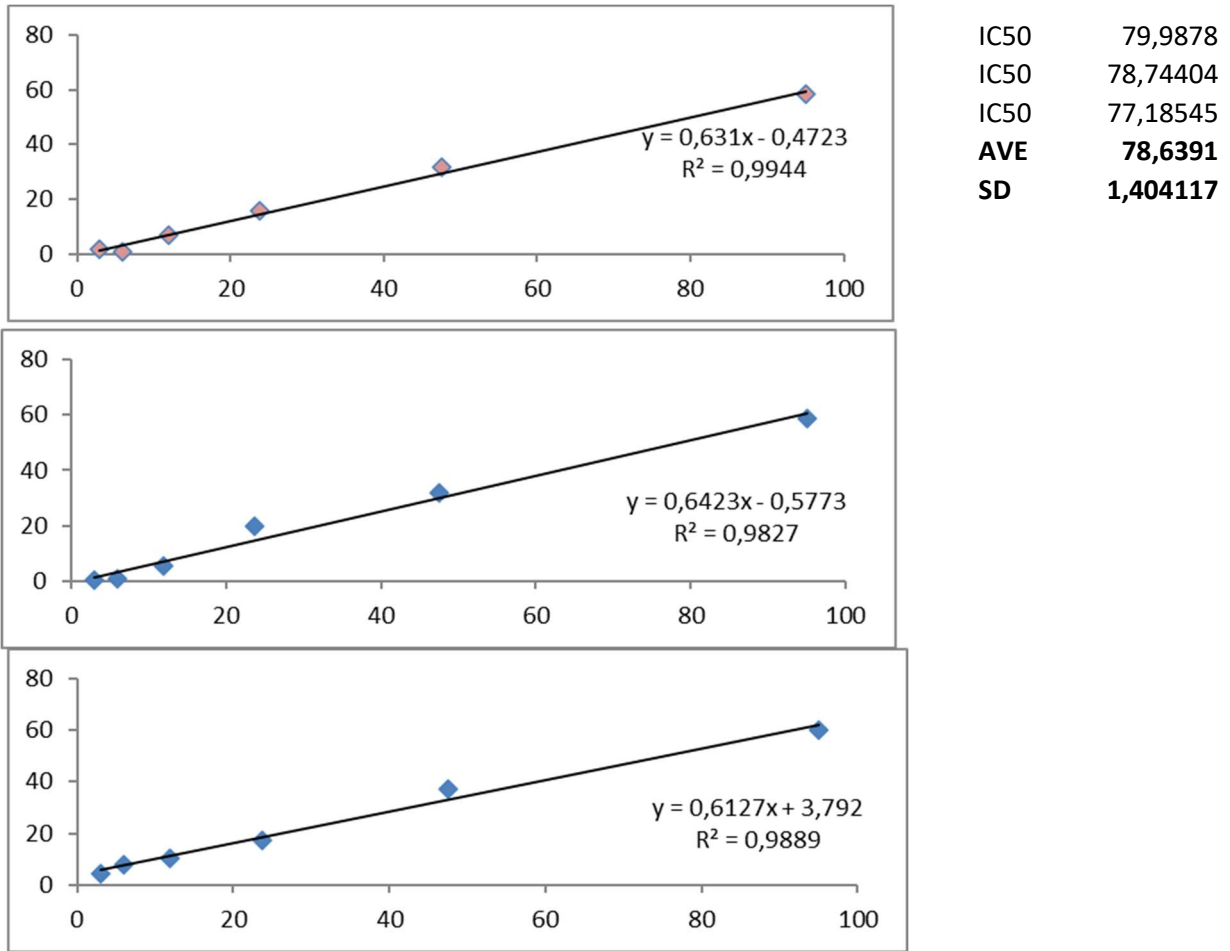

PetOz-PA(C) (1:10)

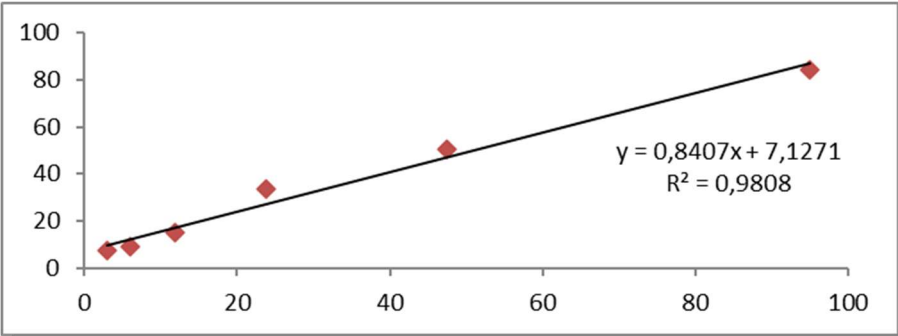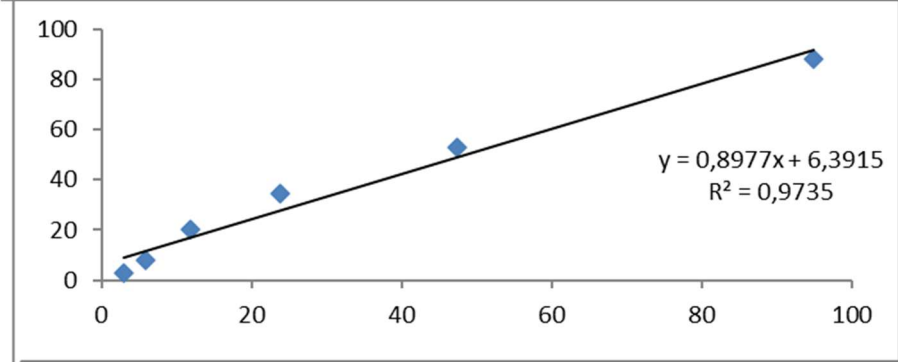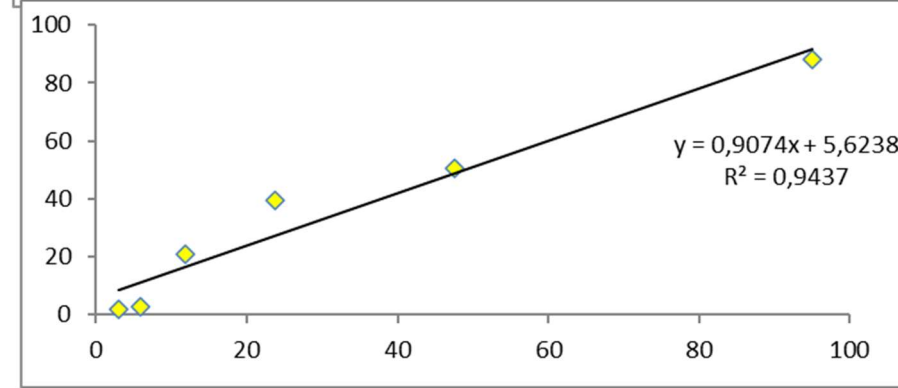

|      |          |
|------|----------|
| IC50 | 50,99667 |
| IC50 | 48,57803 |
| IC50 | 48,90478 |
| AVE  | 49,49316 |
| SD   | 1,312285 |



PetOz-PA(C) (1:5)

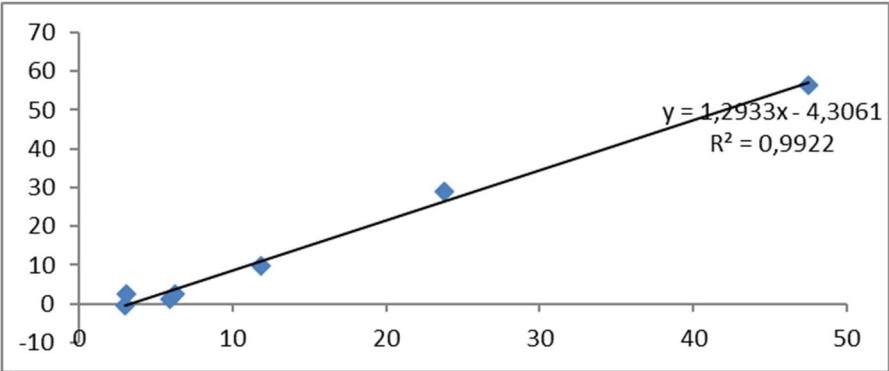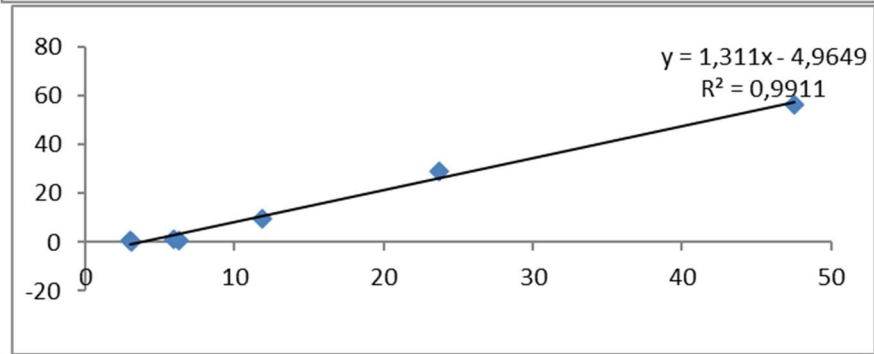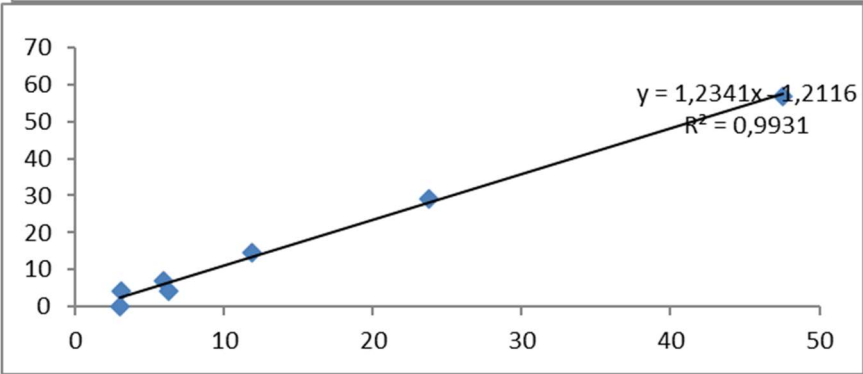

IC50 53,32962  
IC50 41,92593  
IC50 41,49712  
**AVE 41,71153**  
**SD 0,303215**

Curcumin

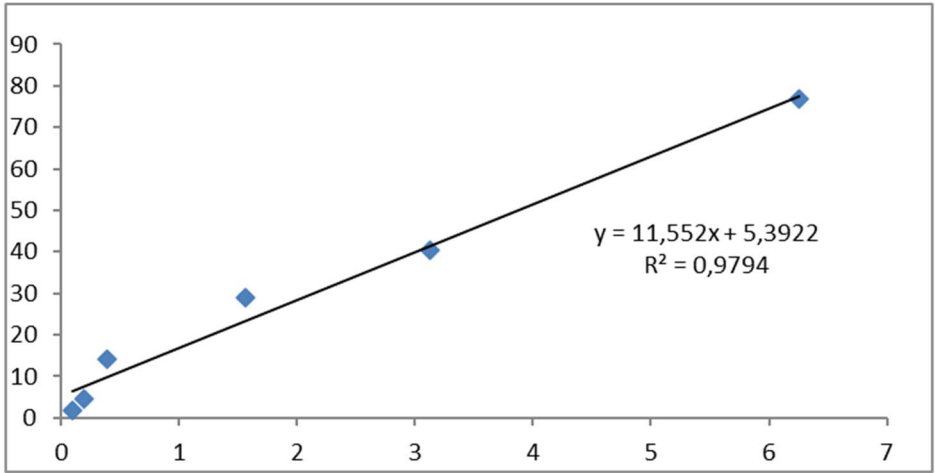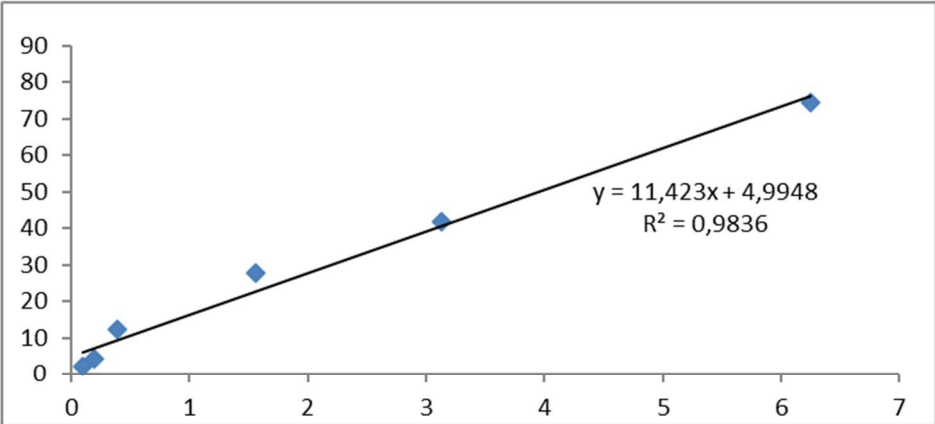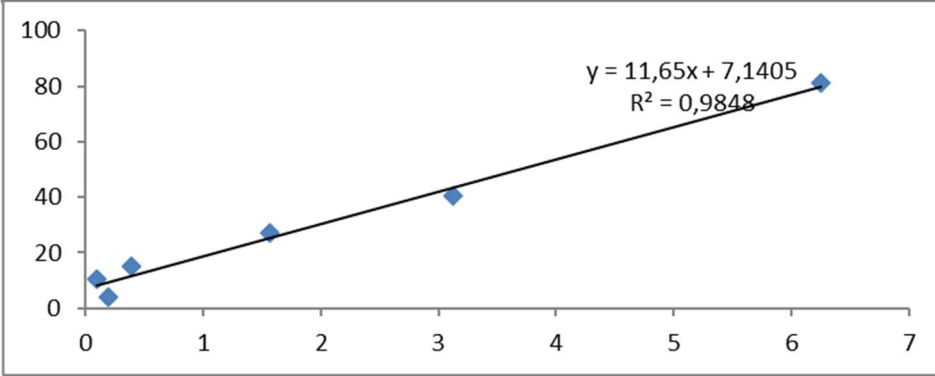

|      |          |
|------|----------|
| IC50 | 3,861479 |
| IC50 | 3,939876 |
| IC50 | 3,678927 |
| AVE  | 3,82676  |
| SD   | 0,055435 |

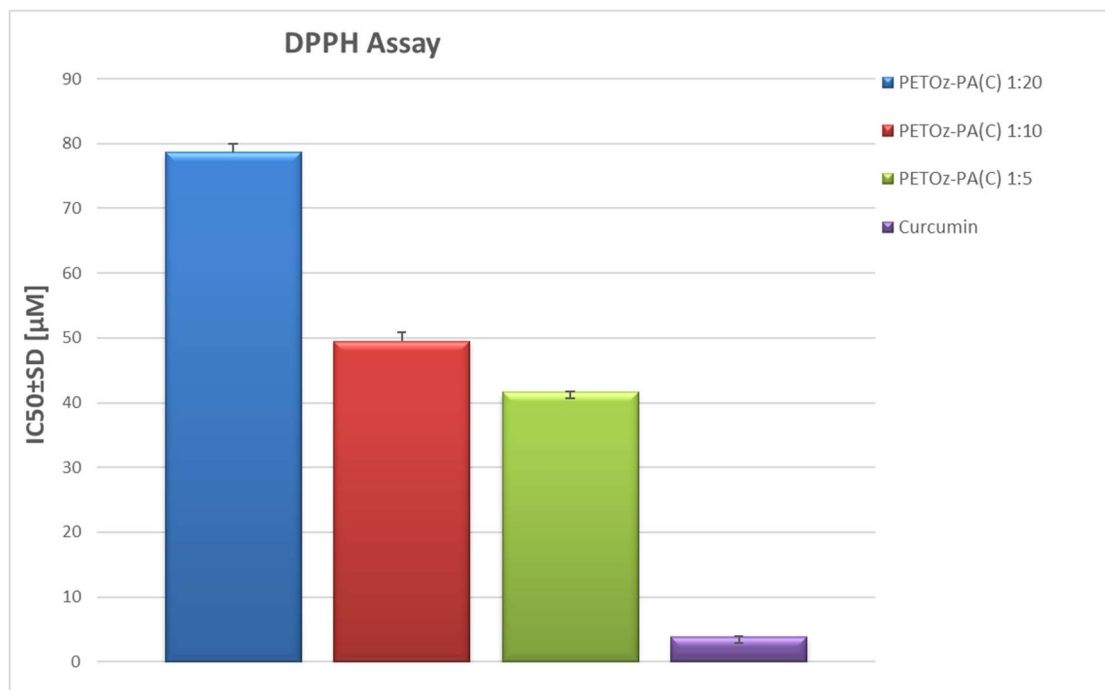

Supplement: s1 [file s1]
